# Supplementary material
Source: MDPI journal article supplement (https://www.mdpi.com/2073-4433/15/5/614)
Supplement: s1 [file s1]

**Supplementary Material**

**Assessment of deadly heat stress and extreme cold  
events in the Upper Midwestern United States**

Manas Khan <sup>1</sup>, Rabin Bhattarai <sup>1,\*</sup>, Liang Chen <sup>2</sup>

<sup>1</sup> Department of Agricultural and Biological Engineering, University of Illinois at Urbana-Champaign, Urbana, USA

<sup>2</sup> Department of Earth and Atmospheric Sciences, University of Nebraska, Lincoln, Nebraska, USA

**\*Corresponding author**

1) Rabin Bhattarai

E-mail: rbhatta2@illinois.edu

1304 W. Pennsylvania Avenue, Urbana, IL 61801, USA. Phone: +1-217-300-0001

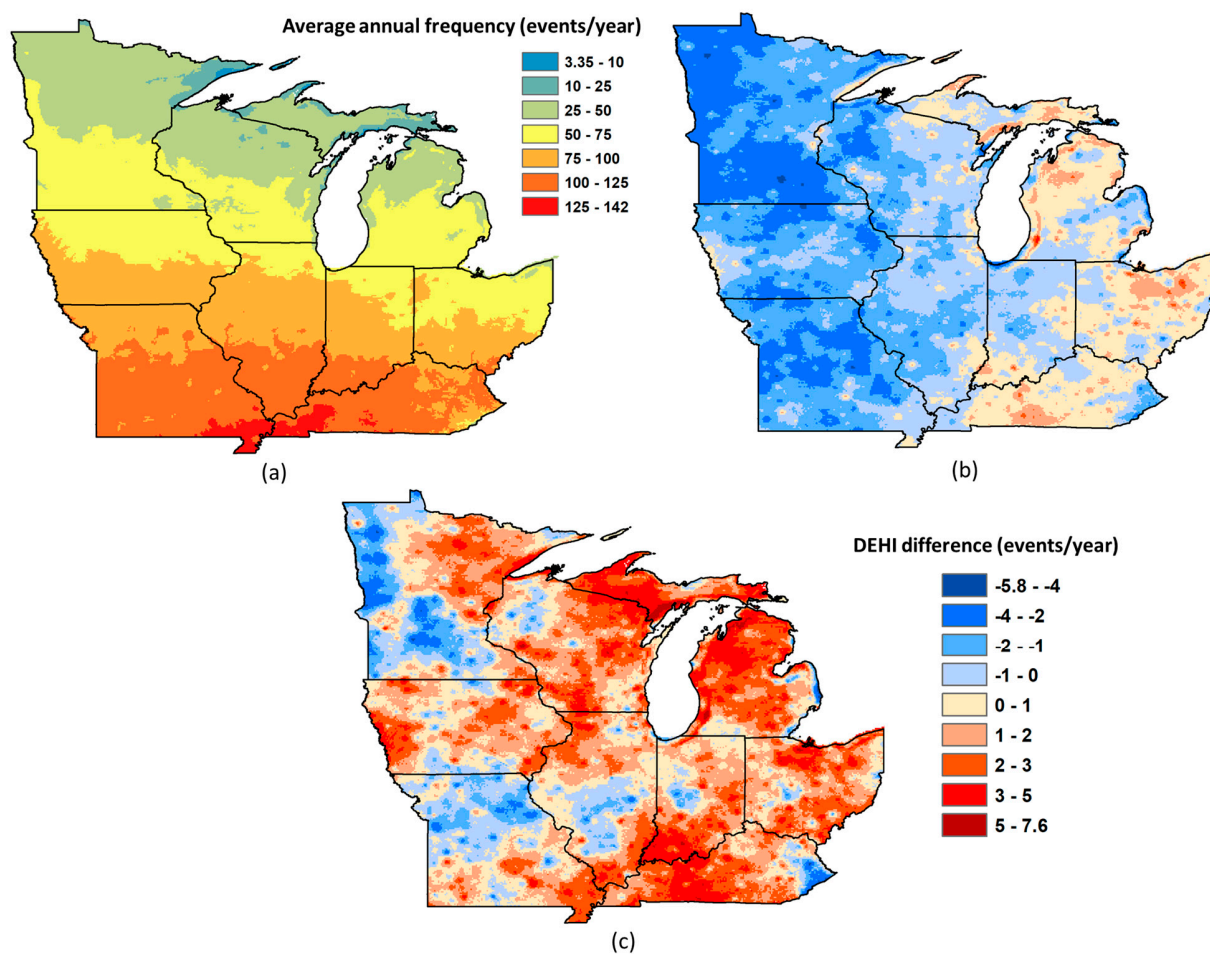

**Figure S1:** (a) Spatial trend of average annual frequency of daytime extreme heat stress (DEHI) from 1979-2021. Spatial trend of difference in average annual frequency of DEHI in the upper Midwestern United States (UMUS) C between (b) 1991-2021 from 1979-2021; and (c) 2001-2021 from 1979-2021.

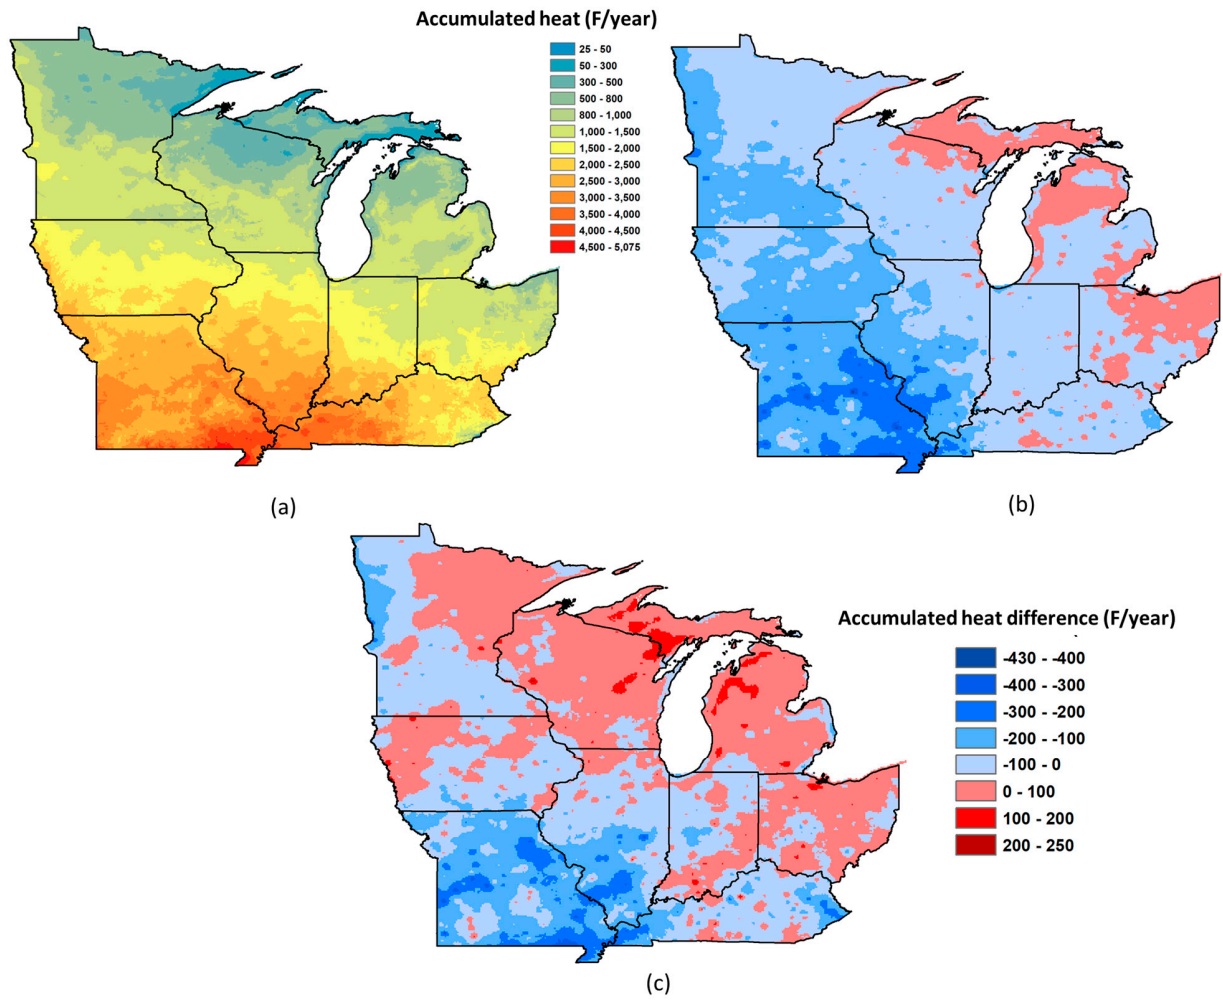

**Figure S2:** (a) Spatial trend of average annual accumulated heat from daytime extreme heat stress (DEHI) from 1979-2021. Spatial trend of difference in average annual accumulated heat from DEHI in the upper Midwestern United States (UMUS) C between (b) 1991-2021 from 1979-2021; and (c) 2001-2021 from 1979-2021.
